# Supplementary material for: Immunohistochemical Examination of Trophoblast Syncytialization during Early Placentation in Sheep
Source: PubMed Central journal article supplement (PMC6769582; doi:10.3390/ijms20184530), 2019-09-13

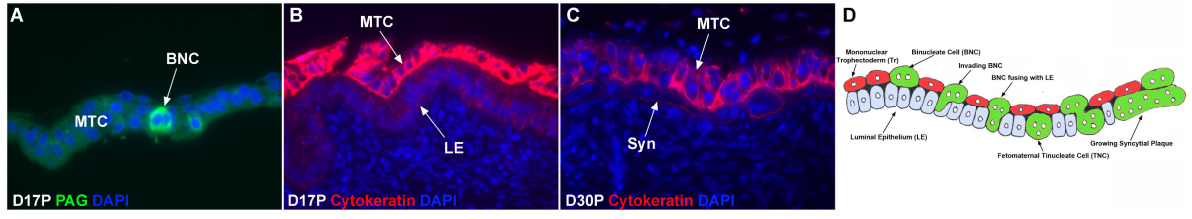

Supplement: ijms-20-04530-s001.pdf [file ijms-20-04530-s001.pdf]
